# Supplementary material for: Upf1 regulates neurite outgrowth and branching by transcriptional and post-transcriptional modulation of Arc
Source: Oxford University Press journal article supplement (doi:10.1242/jcs.224055), 2018-12-24
Supplement: jcs224055supp.pdf [file jcs224055supp.pdf]

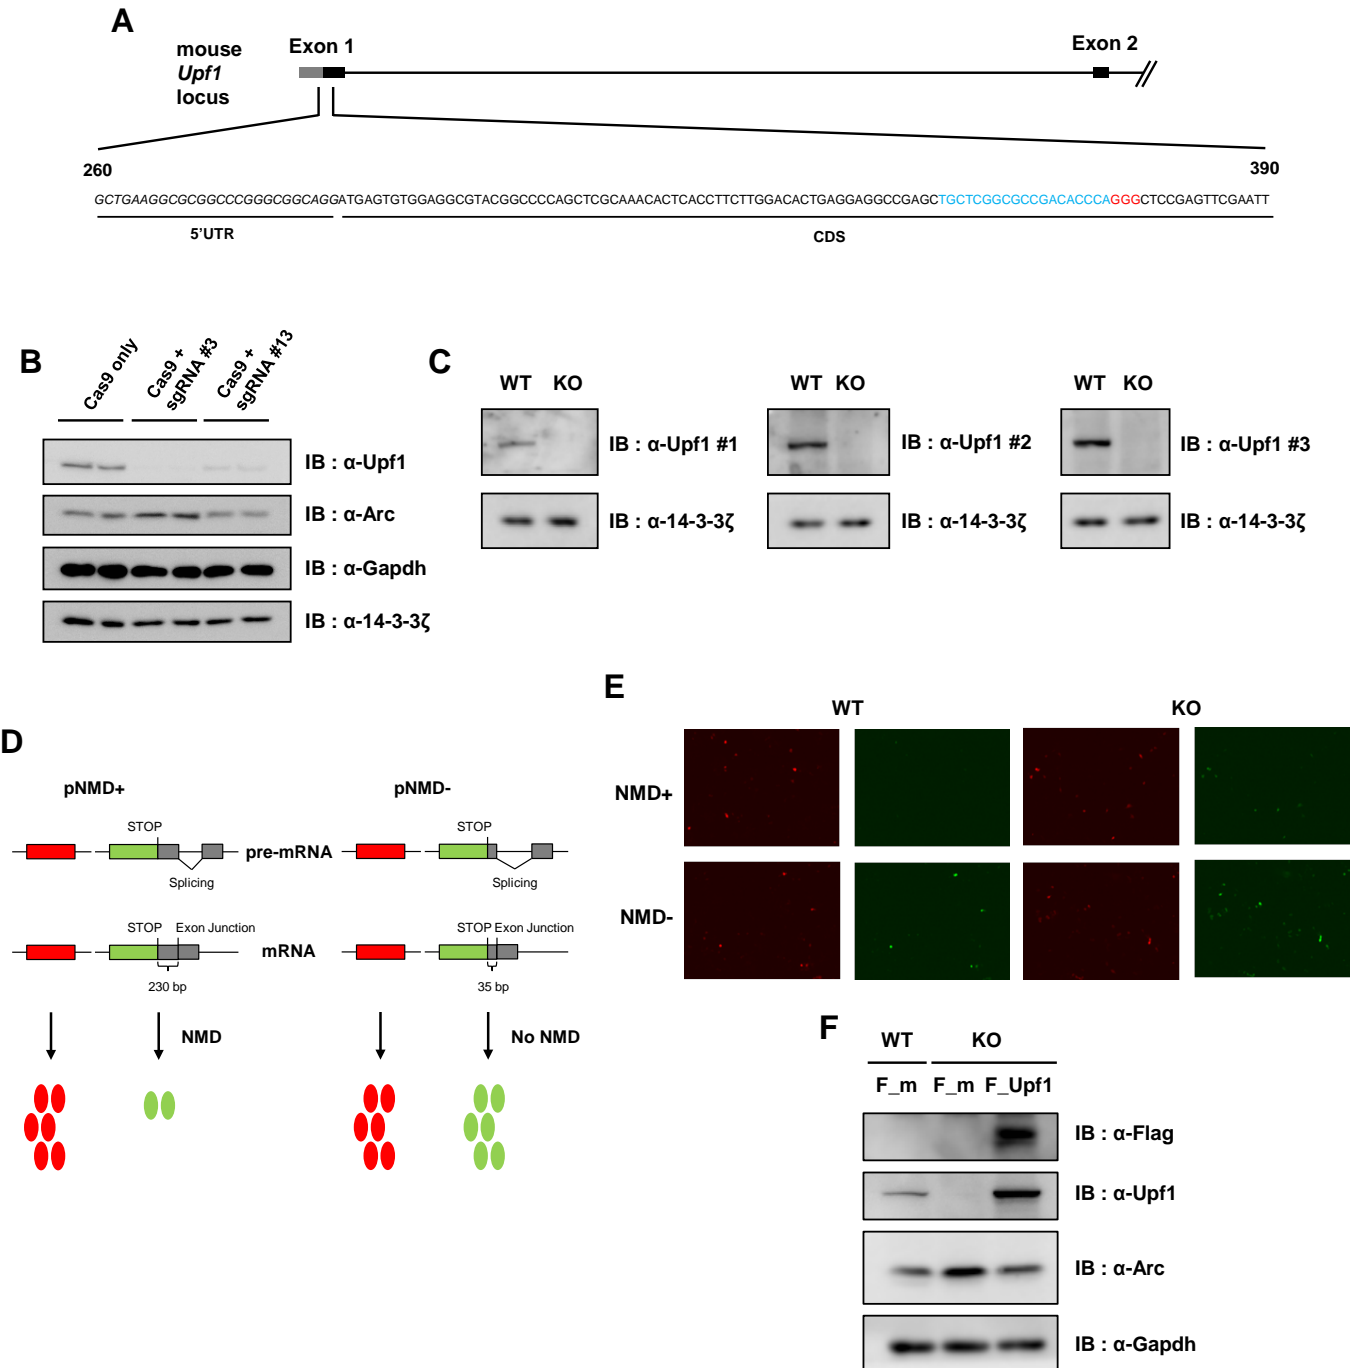

**Figure S1. Generation of *Upf1* knockout (KO) cell lines by CRISPR/Cas9-mediated genome editing.** (A) Schematic diagram of the *Upf1* genome and the gRNA target site in exon 1. The target sequence and PAM motif are highlighted in blue and red, respectively. (B and C) Western blot of *Upf1* knockout cell lines. Equal amount of Cas9 alone-treated cell lysates (WT) and *Upf1* knockout cell lysates (KO) were probed with different anti-*Upf1* antibodies. Experiments were repeated three times with similar observations, and representative data is shown. (D) Schematic diagram of the reporter construct. (E) Fluorescence microscopy of WT and *Upf1* KO cells transiently expressing pNMD+ and pNMD-. Inhibition of NMD by *Upf1* knockout should increase GFP signal of pNMD+ reporter, indicating that NMD pathway is functional in Neuro-2a (N2a) cells. (F) Rescue of *Upf1* alleviates Arc protein induction. F\_m, Flag\_mock; F\_Upf1, Flag\_Upf1.

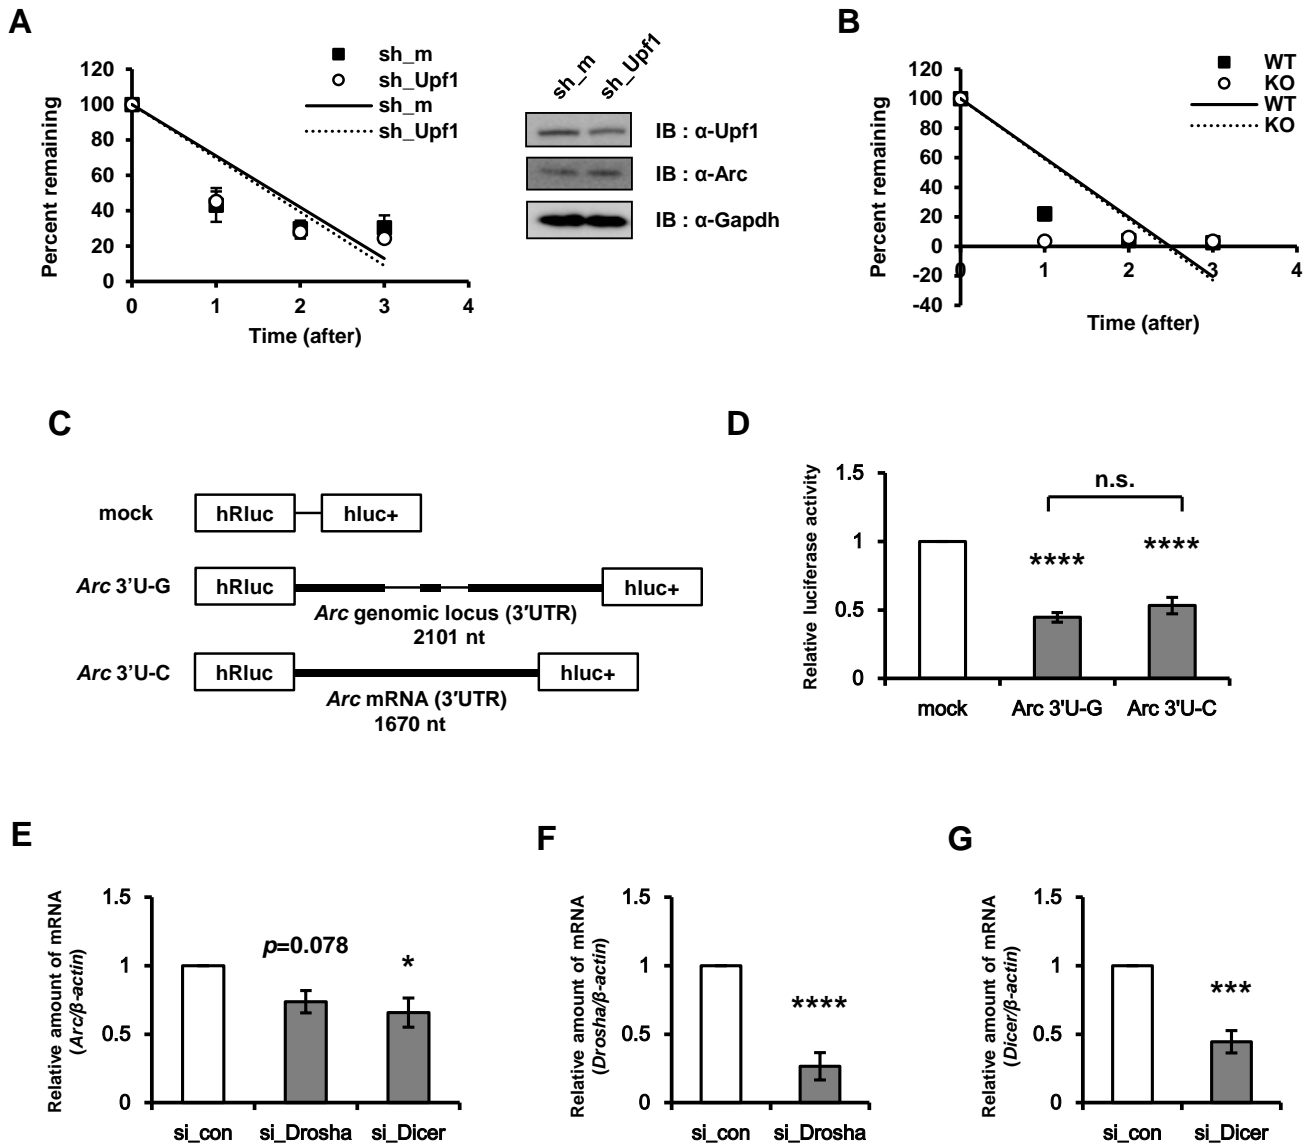

**Figure S2. Effect of Upf1 on *Arc* mRNA and *Arc* expression is regulated by the miRNA biogenesis machinery.** (A) The *Arc* mRNA half-lives under Upf1 silencing in NB41A3 cells ( $n = 3$ ). (B) Analyses of remained *Arc* pre-mRNA after 1, 2, and 3 h of actinomycin D treatment are shown as percentage on y-axis. Error bars represent s.e.m. ( $n = 3$ ). (C) Schematic diagrams of luciferase reporter plasmid containing 3'UTRs of *Arc* mRNA and control plasmid (psiCHECK2). (D) Relative reporter activity was assessed by luciferase assay after transfection either mock or *Arc* 3'UTRs in N2a cells. Renilla luciferase activity was normalized with firefly luciferase activity. Data are represented as the mean  $\pm$  s.e.m. (One-way ANOVA, Tukey's post hoc test,  $n = 5$ , and \*\*\*\* $p < 0.0001$  value.). n.s., not significant. (E) N2a cells were transfected with either *Drossha* siRNA or *Dicer* siRNA and *Arc* mRNA was measured by qRT-PCR (One-way ANOVA, Tukey's post hoc test,  $n = 5$ ; \* $p < 0.05$ ). (F and G) The relative mRNA levels of (F) *Drossha* and (G) *Dicer* were quantified by qRT-PCR and normalized to  $\beta$ -actin (Unpaired two-tailed t test,  $n = 5$ ; \*\*\* $p < 0.001$  and \*\*\*\* $p < 0.0001$ ).

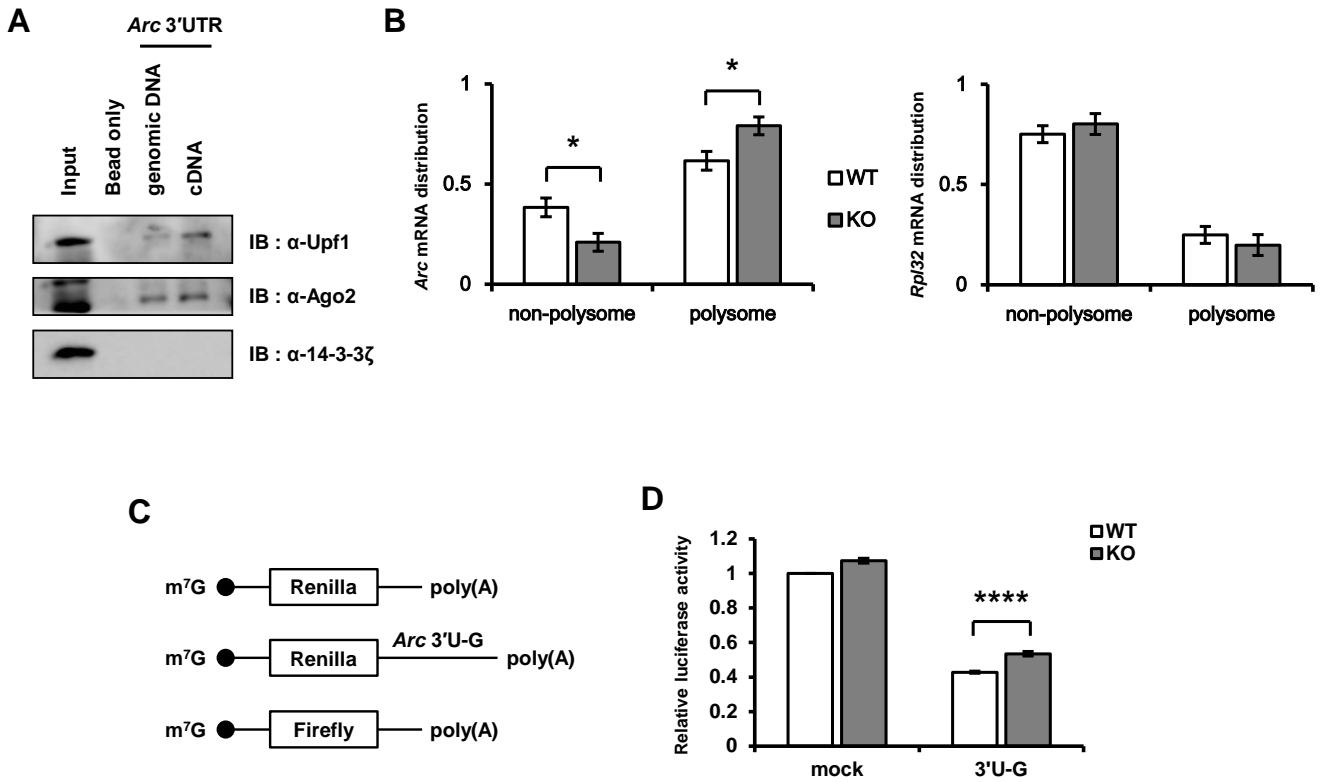

**Figure S3. Upf1 regulates translation of *Arc*.** (A) The interaction between Upf1 and biotinylated transcripts of *Arc* mRNA 3'UTRs was examined by biotin-pull-down analysis. After incubating biotinylated constructs with cell lysates, the binding was analyzed by Western blotting using Upf1 antibody. 14-3-3 $\zeta$  was used as a negative control. (B) Distributions of *Arc* and *Rpl32* mRNAs in the ribosome profiles. Ratio of mRNAs associated with non-polysomes (fraction 1-3) and polysomes (fraction 4-7) (Two-way analysis of variance ANOVA with Sidak's multiple comparisons  $n = 4$ , and  $*p < 0.05$ ). (C) Schematic diagram of the mRNA reporter of *Arc* 3'U-G shows 7-methyl-guanosine ( $m^7G$ ) and poly(A) tail. Firefly mRNA reporters for normalization were also used. (D) Relative reporter activity was assessed by luciferase assay after transfection of cells with mRNA reporters harboring *Arc* 3'U-G or no UTR in WT or KO cells. Renilla luciferase activity was normalized with firefly luciferase activity. Data are represented as the mean  $\pm$  SEM (Two-way analysis of variance ANOVA with Sidak's multiple comparisons  $n = 4$ , and \*\*\*\* $p < 0.0001$  value.).

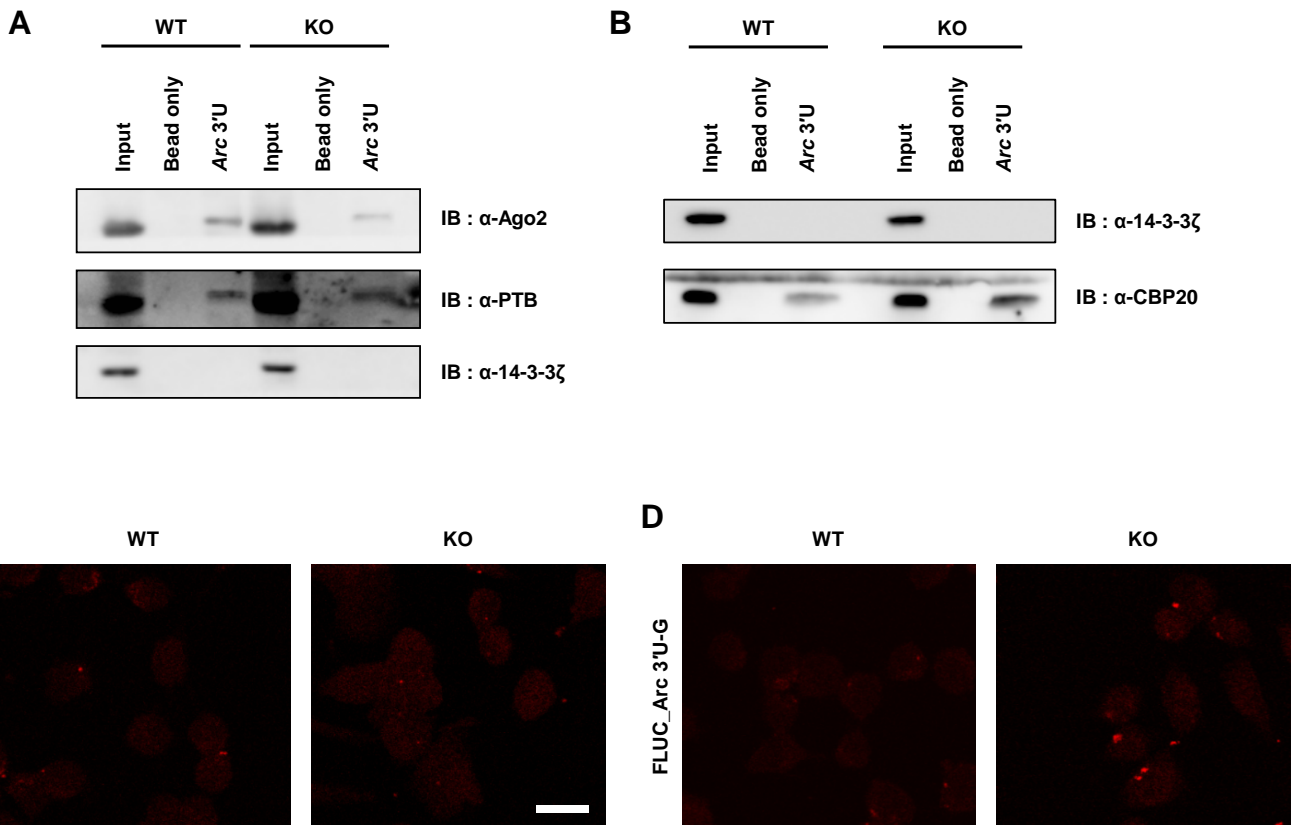

**Figure S4. Ago2 binding affinity to *Arc* 3'UTR correlates with Upf1 levels.** (A) Identification of the interaction between the *Arc* 3'UTR and Ago2 by RNA affinity purification followed by immunoblotting. (B) Abundant CBP20 was detected in the reaction with biotin-labelled *Arc* 3'UTR mRNA. CBP20 binding increased in the depletion of Upf1. 14-3-3ζ was used as a negative control. Experiments were repeated three times with similar observations, and representative data is shown. (C and D) Upf1 KO increases translation of *Arc* through 3'UTR. Either mock (C) or *Arc* 3'U-G (D) vectors were co-transfected with EGFP into mouse hippocampal neurons. At 24 hours later, 5μM puromycin was treated for 90 minutes. To detect newly synthesized FLUC proteins, Puro-PLA assay was conducted. Scale bar = 20 μm.

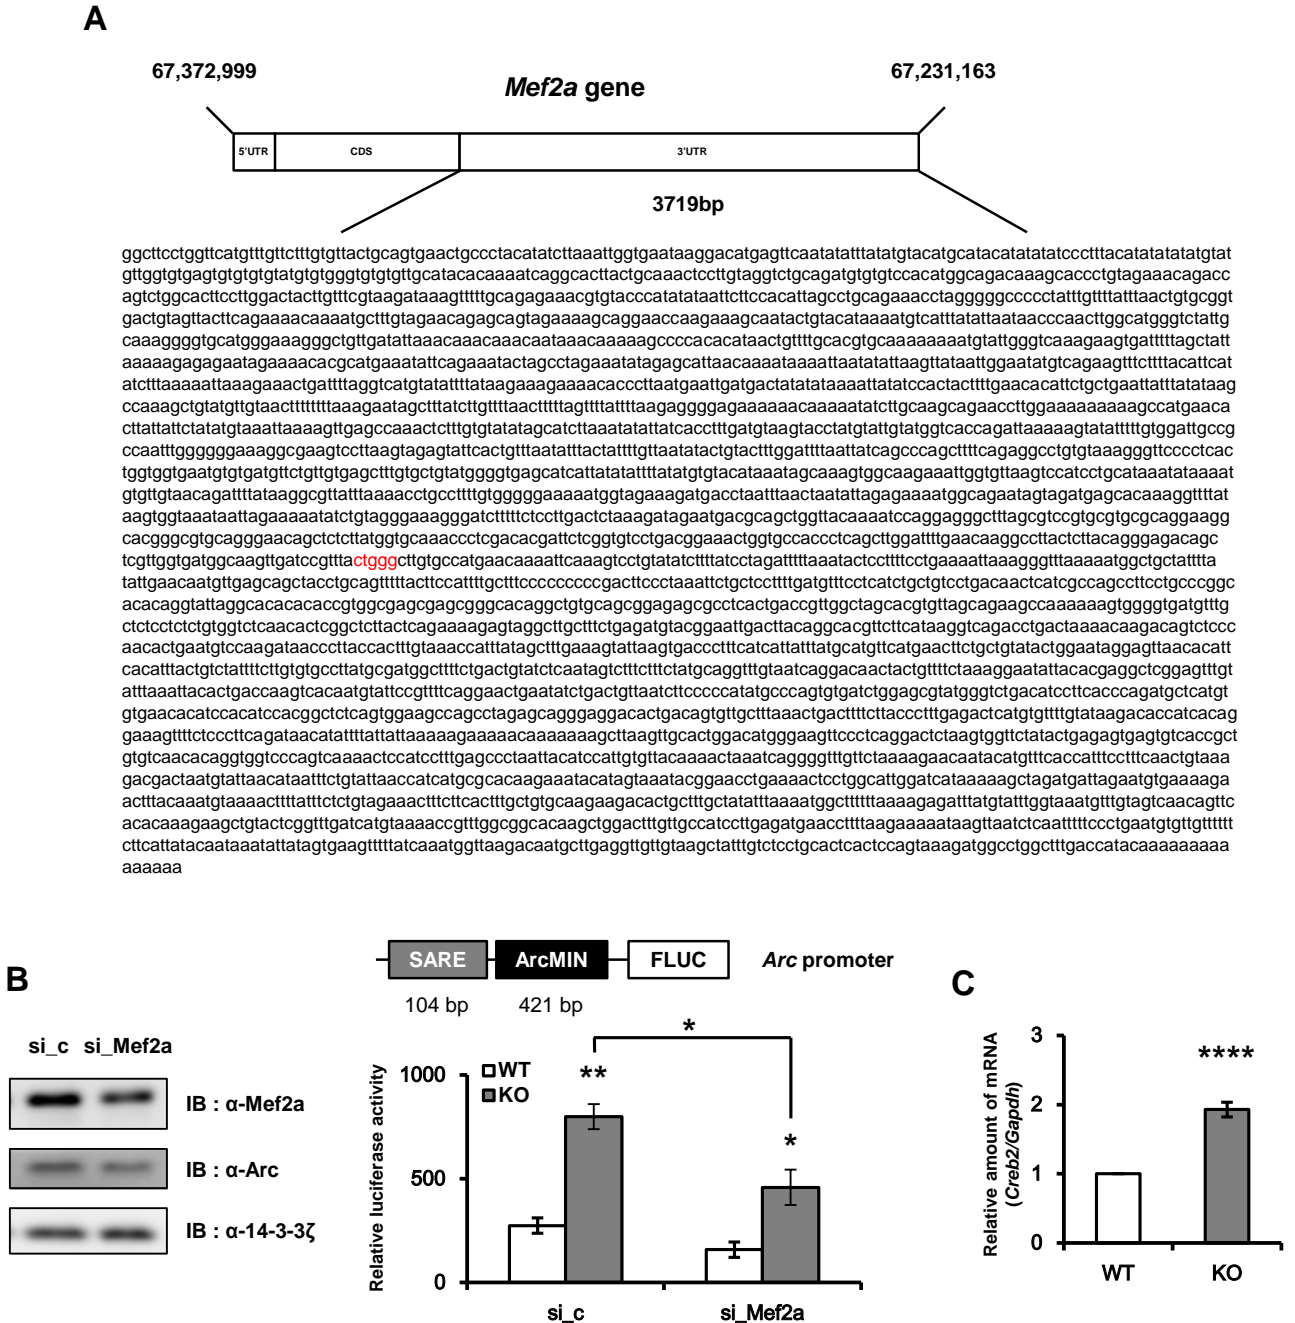

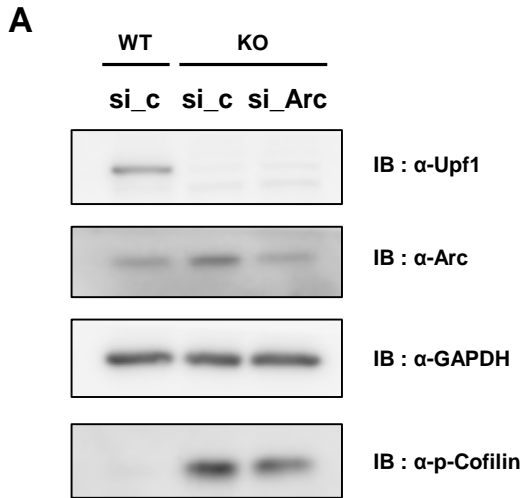

**Figure S6. Expression levels of p-Cofilin in Arc-depleted cells.** (A) Immunoblots to measure levels of the indicated proteins in WT and Upf1 KO cells.
